# Supplementary material for: Influence of precursor molecular weight on swelling and elastic modulus of cross-linked PDMS films
Source: Royal Society of Chemistry journal article supplement (doi:10.1039/d5sm00994d), 2025-12-05

## Supporting information

**Figure S1:** Contact angle measurement with different solvents (a) and surface energy calculation (b) of PDMS-based coatings (Reprinted with permission of reference 11)

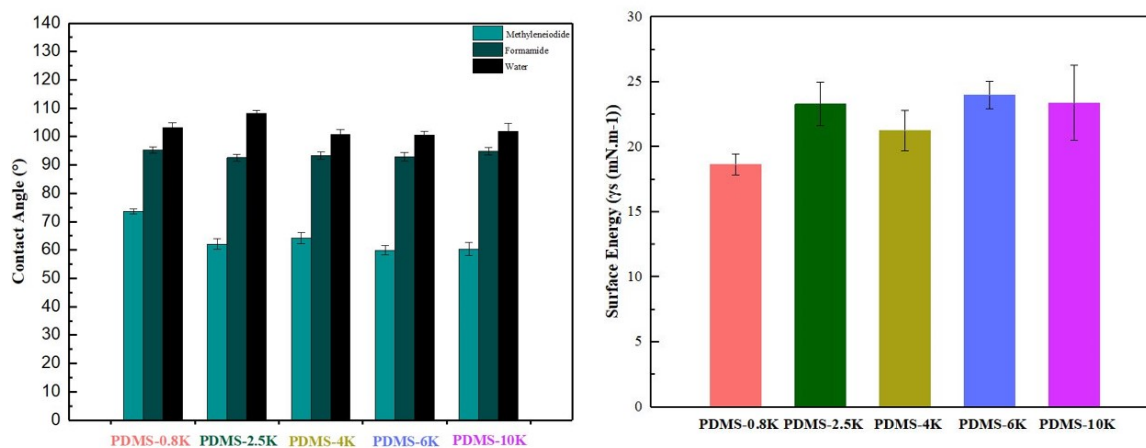

**Figure S2:** Solid-state  $^{29}\text{Si}$  NMR spectra for PDMS films obtained with different molecular weight.

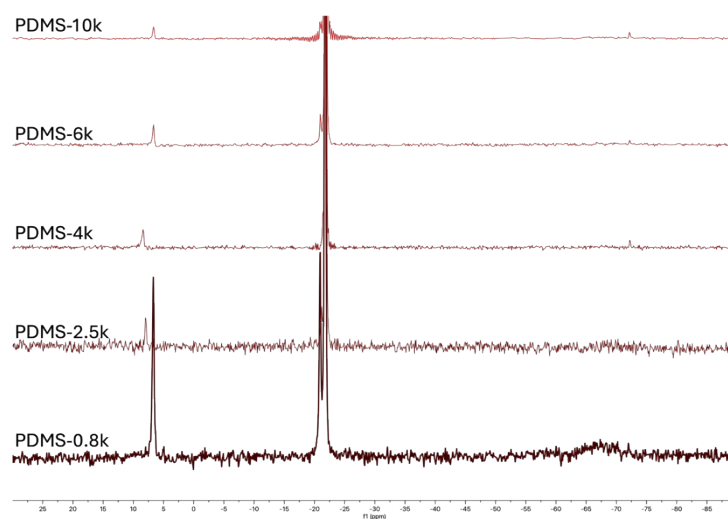

**Figure S3:** Fit by the JKR model for the nanoindentation data of PDMS-0.8K and PDMS-4K.

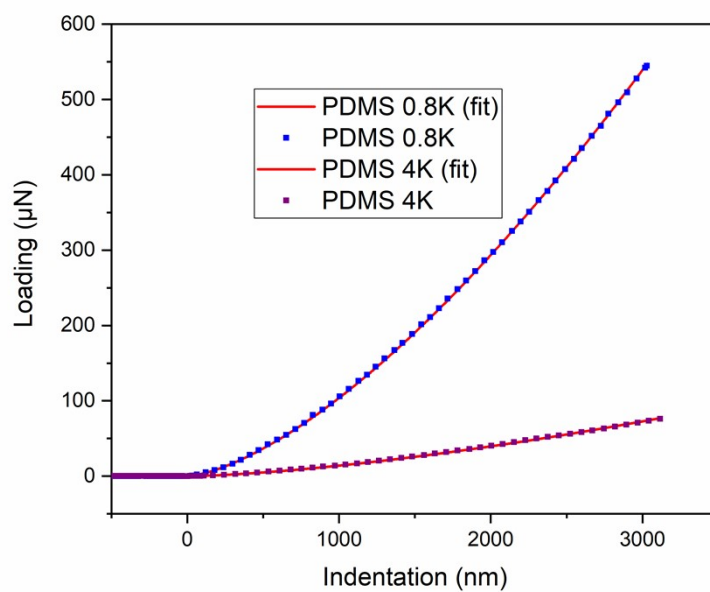

Supplement: d5sm00994d1.pdf [file d5sm00994d1.pdf]
